# Supplementary material for: Enhanced output-power of nanogenerator by modifying PDMS film with lateral ZnO nanotubes and Ag nanowires
Source: Royal Society of Chemistry journal article supplement (doi:10.1039/c5ra02098k), 2015-01-01

Supporting Information for

**Enhanced Output-Power of Nanogenerator by Modifying PDMS film with  
Lateral ZnO Nanotubes and Ag Nanowires**

*Xule Yue, Yi Xi, Chenguo Hu, Xianming He, Shuge Dai, Lu Cheng and Guo Wang*

Department of Applied Physics, Chongqing University, Chongqing, 400044, P.R. China

**Content:**

The contents of Supporting Information includes the following:

1. The diagram of the fabrication of PDMS/PDMS NG and PDMS/ZnO/PDMS NG
2. The screen of the hybrid nanogenerator light up 99 LEDs .

**Fig. S1** The diagram of the fabrication of PDMS/PDMS NG (a) and PDMS/ZnO/PDMS NG (b)

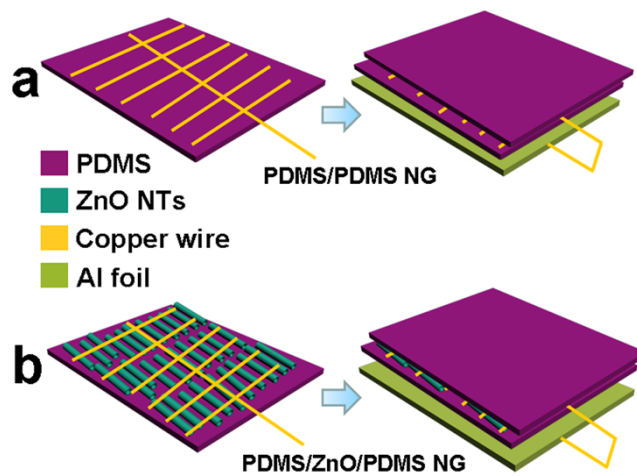

Supplement: c5ra02098k2.pdf [file c5ra02098k2.pdf]
